# Supplementary material
Source: Springer Nature journal article supplement (https://www.springermedizin.de/resource/supplementary/12889_2008_1433_MOESM4_ESM.pdf/9503766)

CHD deaths prevented or postponed

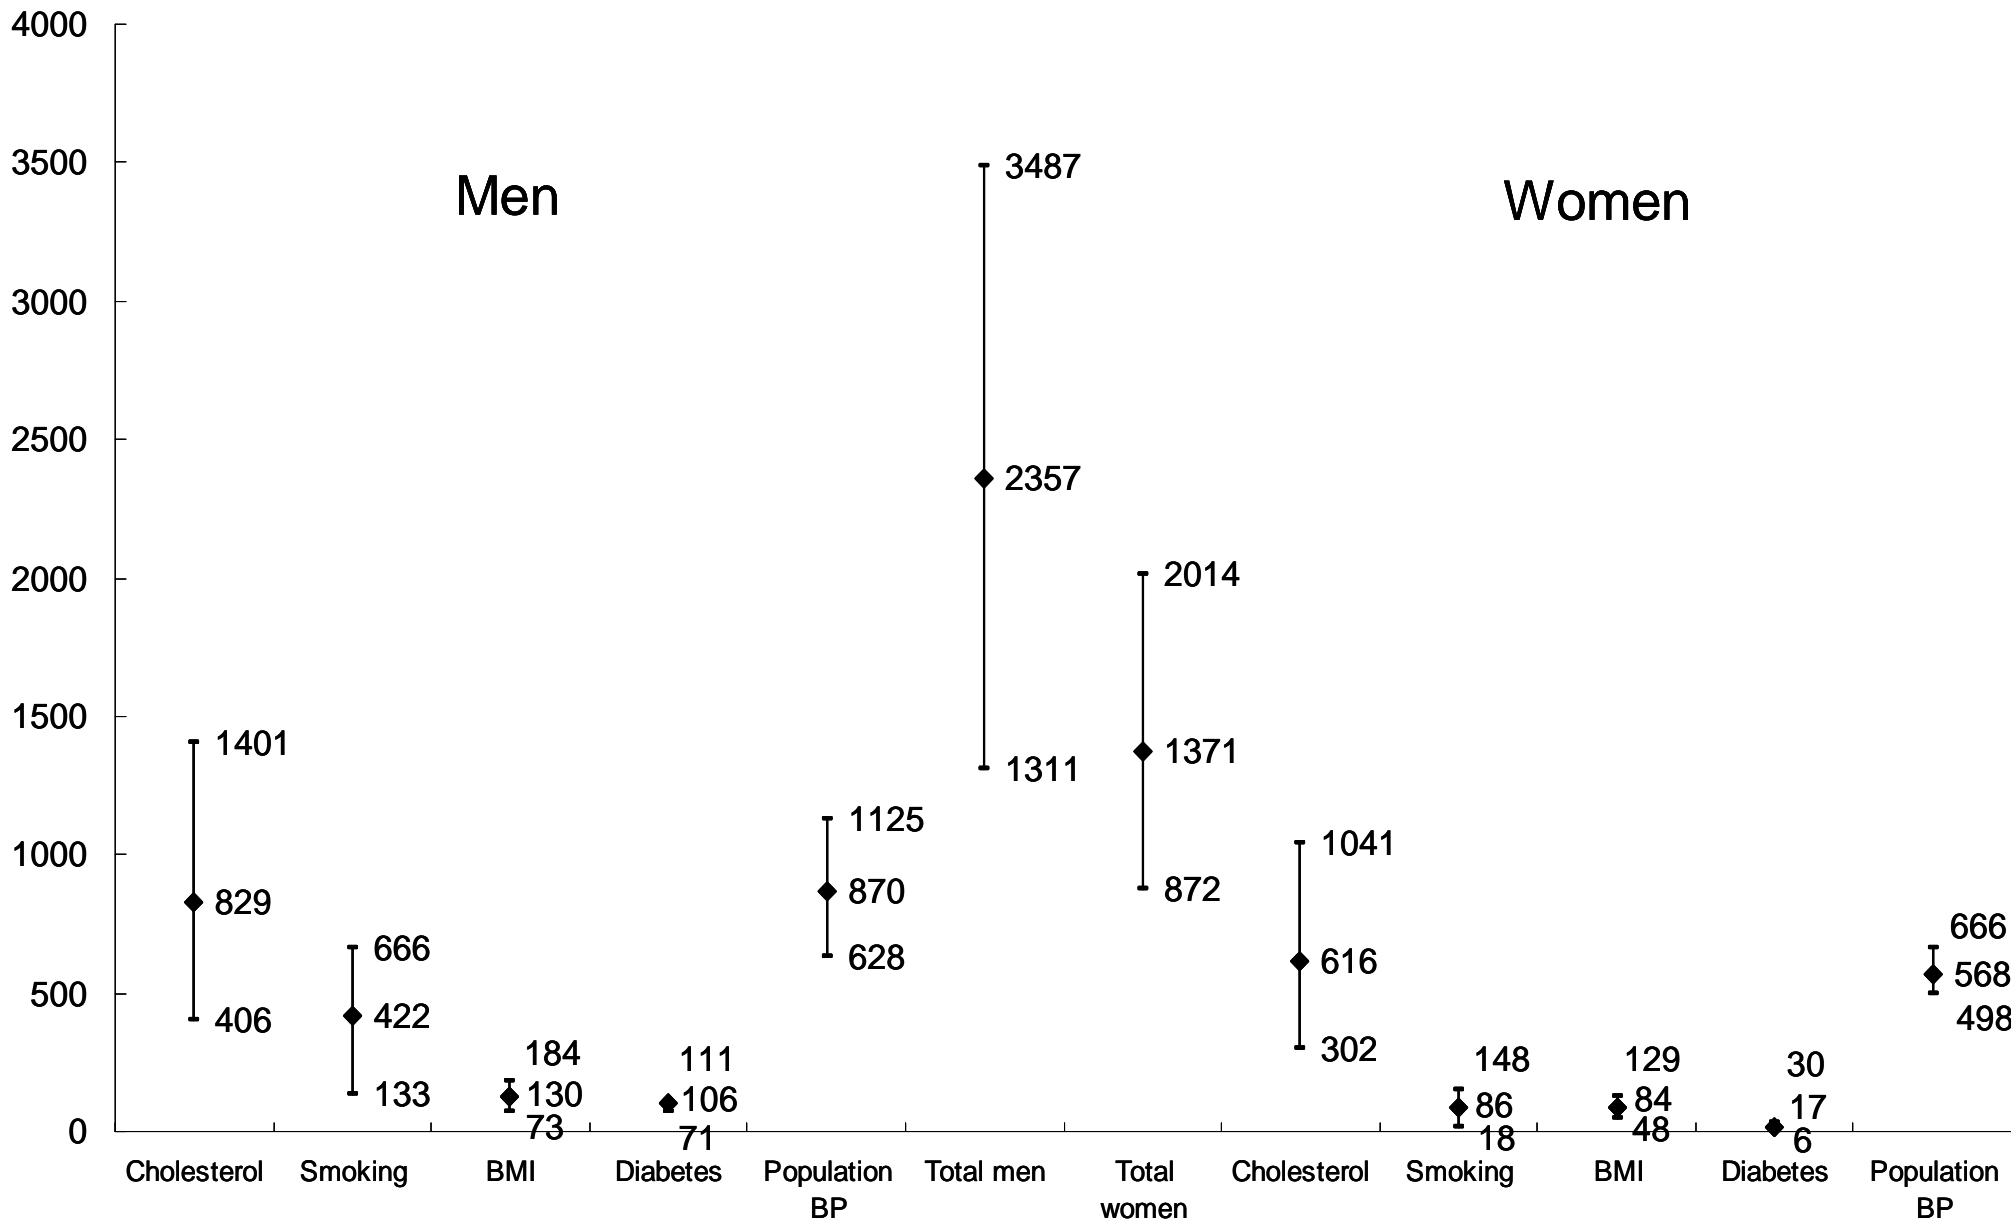

Supplement: MOESM4 [file 9503766]
